# Supplementary material
Source: HighWire-hosted journal article supplement (https://spcare.bmj.com/content/spcare-2023-004242)
Supplement: inline-supplementary-material-1 [file inline-supplementary-material-1.pdf]

## Supplemental files

### Supplementary Table 1

Supplementary Table 1: Items of the PNPC-sv patient form and corresponding percentages of answers provided by patients (n=1103)

| Is this a problem?             |                                                                    |                      | More professional attention?* |
|--------------------------------|--------------------------------------------------------------------|----------------------|-------------------------------|
| 'Yes' and 'Somewhat' (Valid %) | PNPC-sv item: patient form                                         | Domain               | 'Yes, more' (Valid %)         |
| 80.8                           | Worrying about the future of my loved ones                         | Psychological issues | 22.0                          |
| 76.8                           | Fear of metastases                                                 | Psychological issues | 20.6                          |
| 76.8                           | Difficulty coping with the unpredictability of the future          | Psychological issues | 17.8                          |
| 24.2                           | Insufficient information e.g. about the disease and its treatment  | Need of information  | 15.9                          |
| 58.3                           | Fear of physical suffering                                         | Psychological issues | 13.9                          |
| 38.6                           | Extra expenditures because of the disease                          | Financial problems   | 13.7                          |
| 83.2                           | Fatigue                                                            | Physical symptoms    | 13.6                          |
| 28.1                           | Insufficient information on the end of life                        | Need of information  | 13.6                          |
| 54.2                           | Experiencing loss of control over one's life                       | Autonomy             | 12.9                          |
| 22.0                           | Insufficient information on physical activity                      | Need of information  | 11.9                          |
| 31.4                           | Loss of income because of the disease                              | Financial problems   | 11.6                          |
| 17.1                           | Insufficient information on nutrition                              | Need of information  | 11.5                          |
| 64.0                           | Being dependent of others                                          | Autonomy             | 11.3                          |
| 67.0                           | Difficulties in continuing the usual activities                    | Autonomy             | 10.6                          |
| 51.4                           | Difficulties to accept the disease                                 | Spiritual issues     | 10.3                          |
| 49.5                           | Prickling or numb sensation                                        | Physical symptoms    | 10.1                          |
| 48.6                           | Fear of death                                                      | Psychological issues | 10.1                          |
| 61.5                           | Pain                                                               | Physical symptoms    | 9.7                           |
| 49.1                           | Difficulty to give tasks out of hands                              | Autonomy             | 9.7                           |
| 42.1                           | Difficulties to be engaged usefully                                | Spiritual issues     | 9.0                           |
| 46.0                           | Shortness of breath                                                | Physical symptoms    | 8.6                           |
| 47.0                           | Sleeping problems                                                  | Physical symptoms    | 8.4                           |
| 46.9                           | Dry mouth                                                          | Physical symptoms    | 8.4                           |
| 44.3                           | Difficulties to be avail for others                                | Spiritual issues     | 8.3                           |
| 18.0                           | Information about places and agencies that provide help (and aids) | Need of information  | 8.3                           |

|      |                                                                                         |                      |     |
|------|-----------------------------------------------------------------------------------------|----------------------|-----|
| 46.0 | Depressed mood                                                                          | Psychological issues | 7.7 |
| 39.3 | (Nightly) sweating or hot flushes                                                       | Physical symptoms    | 7.6 |
| 33.7 | Finding it difficult to talk about the disease, because of not wanting to burden others | Social issues        | 7.6 |
| 13.4 | Difficulties in finding someone to talk to (confidant)                                  | Social issues        | 7.1 |
| 38.4 | Difficulties concerning the meaning of death                                            | Spiritual issues     | 7.0 |
| 34.7 | Sexual dysfunction                                                                      | Psychological issues | 6.1 |
| 33.1 | Difficulties in showing emotions                                                        | Physical symptoms    | 6.1 |
| 37.5 | Drowsiness                                                                              | Physical symptoms    | 6.0 |
| 38.7 | Lack of appetite                                                                        | Physical symptoms    | 5.8 |
| 35.3 | Cough                                                                                   | Physical symptoms    | 5.4 |
| 16.6 | Problems in the relationship with life companion                                        | Social issues        | 5.4 |
| 23.1 | Experiencing too little support by others                                               | Social issues        | 5.1 |
| 17.3 | Difficulties in talking about the disease with life companion                           | Social issues        | 4.3 |
| 24.7 | Itch                                                                                    | Physical symptoms    | 3.9 |
| 20.2 | Finding others not receptive to talking about the disease                               | Social issues        | 3.6 |

\*. Valid % includes the percentage of all patients that wanted more professional attention for a specific item, irrespective of whether they regarded the item a problem.

## Supplementary Table 2

Supplementary Table 2: Items of the PNPC-sv relative form and corresponding percentages of answers provided by relatives (n=831)

| Is this a problem?             |                                                                                                        |                                         | More professional attention?* |
|--------------------------------|--------------------------------------------------------------------------------------------------------|-----------------------------------------|-------------------------------|
| 'Yes' and 'Somewhat' (Valid %) | PNPC-sv item – relative form                                                                           | Domain                                  | 'Yes, more' (Valid %)         |
| 88.3                           | Fear for physical suffering of the patient                                                             | Psychological issues                    | 32.8                          |
| 83.9                           | Fear of metastases                                                                                     | Psychological issues                    | 29.3                          |
| 48.1                           | Knowing what physical signs I should notice                                                            | Caregiving                              | 27.5                          |
| 79.3                           | Fear of an unpredictable future                                                                        | Psychological issues                    | 23.0                          |
| 43.5                           | How I should handle the patient's pain                                                                 | Caregiving                              | 22.5                          |
| 69.6                           | Fear of death                                                                                          | Psychological issues                    | 20.1                          |
| 31.0                           | Insufficient information regarding the end of life                                                     | Need of information                     | 16.4                          |
| 24.5                           | Lack of conversations with a healthcare provider about the situation without the patient present       | General matters in providing assistance | 15.8                          |
| 25.8                           | Insufficient information about supportive care (psychological support, social work, etc.) for yourself | Need of information                     | 14.4                          |
| 32.3                           | Difficulties in making arrangements (last will and testament, insurance etc.).                         | Financial problems                      | 13.8                          |
| 24.6                           | Difficulties in getting access to help from agencies/professional organizations.                       | General matters in providing assistance | 13.8                          |
| 24.5                           | How I should deal with the patient's nourishment                                                       | Caregiving                              | 13.7                          |
| 46.6                           | Fear that the patient's personality has changed                                                        | Relationship with the patient           | 12.9                          |
| 51.6                           | Fatigue                                                                                                | Physical symptoms                       | 12.7                          |
| 24.8                           | Insufficient information on physical activity of the patient                                           | Need of information                     | 12.7                          |
| 60.5                           | Hope for the future                                                                                    | Spiritual issues                        | 12.6                          |
| 23.9                           | Insufficient information about disease and treatment                                                   | Need of information                     | 12.4                          |
| 34.5                           | Difficulties in talking about the disease with patient                                                 | Relationship with the patient           | 12.0                          |
| 28.6                           | Extra expenditure because of the disease                                                               | Financial problems                      | 12.0                          |
| 48.9                           | Difficulties in showing emotions                                                                       | Psychological issues                    | 11.7                          |
| 43.4                           | Sleeping problems                                                                                      | Physical symptoms                       | 11.5                          |
| 53.9                           | Accepting the patients disease                                                                         | Spiritual issues                        | 10.9                          |
| 15.3                           | Information on nourishment                                                                             | Need of information                     | 10.7                          |
| 33.4                           | Doing heavy housework (changing beds etc.)                                                             | Daily activities                        | 10.4                          |
| 20.5                           | Difficulties fine-tuning the care of different professionals                                           | General matters in providing assistance | 10.4                          |
| 42.6                           | Depressed mood                                                                                         | Psychological issues                    | 10.3                          |

|      |                                                                                   |                                         |     |
|------|-----------------------------------------------------------------------------------|-----------------------------------------|-----|
| 17.3 | Insufficient adjustment of hospital care to the home situation                    | General matters in providing assistance | 9.7 |
| 45.8 | The meaning of death                                                              | Spiritual issues                        | 9.4 |
| 17.1 | Lack of information in writing (inability to reread information)                  | General matters in providing assistance | 8.7 |
| 25.7 | How I can help the patient fill the days                                          | Caregiving                              | 8.5 |
| 29.3 | How to find someone who, now and then, can take over the patient's care           | Psychological issues                    | 8.3 |
| 19.6 | No longer experiencing any pleasure                                               | Caregiving                              | 8.3 |
| 34.6 | Not wanting to leave the patient alone                                            | Other matters                           | 8.2 |
| 33.8 | Changing the tasks and responsibilities in the family                             | Functional autonomy                     | 8.1 |
| 33.5 | Activities to relax                                                               | Functional autonomy                     | 7.5 |
| 20.5 | The contact with family, friends, neighbors, and colleagues                       | Social issues                           | 6.6 |
| 26.6 | Being dependent of others                                                         | Functional autonomy                     | 6.5 |
| 34.4 | Continuing to do the thing I do for others                                        | Functional autonomy                     | 6.4 |
| 24.7 | Sexuality in my relationship with the patient                                     | Relationship with the patient           | 6.1 |
| 19.6 | My feelings of not being supported by others                                      | Social issues                           | 5.8 |
| 22.9 | That the patient is in denial of the severity of the situation                    | Other matters                           | 5.7 |
| 30.7 | Feelings of guilt                                                                 | Psychological issues                    | 5.3 |
| 8.4  | Disagreement (with patient or family) about the treatment the patient should have | Other matters                           | 2.2 |
| 7.0  | Feeling abandoned by the people in my environment                                 | Social issues                           | 1.5 |

\*. Valid % includes the percentage of all relatives that wanted more professional attention for a specific item, irrespective of whether they regarded the item a problem.

### Supplementary Table 3

Supplementary Table 3: Spearman's rank correlation coefficients ( $r_s$ ) used to evaluate the possible relationship between the patients' characteristics and the total score of unmet needs and the scores of unmet needs per domain

|                                               | Sum score | Autonomy | Need of information | Physical symptoms | Spiritual issues | Financial problems | Social issues | Psychological issues |
|-----------------------------------------------|-----------|----------|---------------------|-------------------|------------------|--------------------|---------------|----------------------|
|                                               | $r_s$     | $r_s$    | $r_s$               | $r_s$             | $r_s$            | $r_s$              | $r_s$         | $r_s$                |
| <b>Age</b>                                    | -.093**   | -.011    | -.122**             | -.080*            | .006             | -.142**            | -.082**       | -0.46                |
| <b>Gender</b><br>(Male/Female)                | .074*     | -.002    | .078*               | .030              | .033             | .014               | .048          | .050                 |
| <b>Marital status</b><br>(Partner/No partner) | .082*     | .046     | .072*               | .020              | .032             | .039               | .059          | .041                 |
| <b>Educational level</b><br>(Low/Medium/High) | -.042     | -.075*   | .070*               | -.031             | -.105**          | -.088**            | -.076*        | -.031                |
| <b>Nationality</b><br>(Dutch/not Dutch)       | .047      | .013     | .072*               | .073*             | .007             | .017               | .018          | .027                 |

\*. Correlation is significant at the 0.05 level (2-tailed).

\*\* . Correlation is significant at the 0.01 level (2-tailed).

### Supplementary Table 4a

Supplementary Table 4a: Spearman's rank correlation coefficients ( $r_s$ ) used to evaluate the possible relationship between the relatives' characteristics and the total score of unmet needs and the scores of unmet needs per domain

|                                                  | Sum score | Caregiving | Physical symptoms | Relationship with the patient | Autonomy | Social issues | Psychological issues | Financial problems | Daily activities | Other matters | General matters in providing assistance | Spiritual issues | Need of information |
|--------------------------------------------------|-----------|------------|-------------------|-------------------------------|----------|---------------|----------------------|--------------------|------------------|---------------|-----------------------------------------|------------------|---------------------|
|                                                  | $r_s$     | $r_s$      | $r_s$             | $r_s$                         | $r_s$    | $r_s$         | $r_s$                | $r_s$              | $r_s$            | $r_s$         | $r_s$                                   | $r_s$            | $r_s$               |
| <b>Age</b>                                       | -.121**   | -.127**    | .005              | -.158**                       | -.079*   | -.059         | -.061                | -.093*             | -.005            | -.128**       | -.147**                                 | -.027            | -.094*              |
| <b>Gender</b><br>(Male'/Female')                 | -.022     | -.052      | .012              | .019                          | .015     | -.002         | -.016                | -.003              | -.037            | .026          | -.015                                   | .053             | .037                |
| <b>Marital status</b><br>(Partner'/No partner')  | .019      | .050       | -.011             | .046                          | .010     | .012          | .002                 | -.006              | .015             | .060          | .040                                    | -.033            | -.011               |
| <b>Educational level</b><br>(Low'/Medium'/High') | .099**    | .139**     | .038              | .072*                         | .078*    | -.011         | .061                 | .081*              | .006             | .105**        | .138**                                  | .046             | .151**              |
| <b>Nationality</b><br>(Dutch'/not Dutch')        | .063      | .089*      | .027              | .058                          | .053     | .054          | .056                 | .028               | .017             | .009          | .033                                    | .064             | .046                |

\*. Correlation is significant at the 0.05 level (2-tailed).

\*\* . Correlation is significant at the 0.01 level (2-tailed).

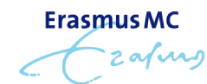

### Supplementary Table 4b

Supplementary table 4b: Mean and standard deviations of multiple domain scores per category of the relatives' nature of relationship, and the results of the Kruskal-Wallis H test

| Domains<br>Subcategories                           | Mean<br>scores | N   | SD    | H-<br>Statistic | df | Sig.  | Pairwise<br>comparisons<br>(Std. Test<br>Statistic) | Adj.<br>Sig. | Effect<br>size |
|----------------------------------------------------|----------------|-----|-------|-----------------|----|-------|-----------------------------------------------------|--------------|----------------|
| <b>Total</b>                                       |                |     |       | 7.90            | 3  | .048* |                                                     |              |                |
| Spouse                                             | 11.95          | 553 | 16.29 |                 |    |       |                                                     |              |                |
| Son or daughter                                    | 13.84          | 127 | 17.57 |                 |    |       |                                                     |              |                |
| Other family member                                | 8.57           | 36  | 17.31 |                 |    |       | 2.78                                                | .033*        | .218           |
| Friend                                             | 10.65          | 23  | 11.66 |                 |    |       |                                                     |              |                |
| Total                                              | 12.07          | 739 | 16.45 |                 |    |       |                                                     |              |                |
| Missing                                            |                | 92  |       |                 |    |       |                                                     |              |                |
| <b>Caregiving</b>                                  |                |     |       | 11.89           | 3  | .008* |                                                     |              |                |
| Spouse                                             | 15.34          | 559 | 24.66 |                 |    |       |                                                     |              |                |
| Son or daughter                                    | 21.93          | 129 | 27.29 |                 |    |       | -3.07                                               | .013*        | -.117          |
| Other family member                                | 9.86           | 37  | 19.31 |                 |    |       |                                                     |              |                |
| Friend                                             | 19.17          | 24  | 27.33 |                 |    |       | 2.70                                                | .041*        | .210           |
| Total                                              | 16.32          | 749 | 25.11 |                 |    |       |                                                     |              |                |
| Missing                                            |                | 82  |       |                 |    |       |                                                     |              |                |
| <b>General matters in<br/>providing assistance</b> |                |     |       | 15.06           | 3  | .002* |                                                     |              |                |
| Spouse                                             | 9.97           | 547 | 19.56 |                 |    |       |                                                     |              |                |
| Son or daughter                                    | 19.74          | 128 | 29.13 |                 |    |       | -3.84                                               | .001*        | -.148          |
| Other family member                                | 10.29          | 35  | 21.89 |                 |    |       |                                                     |              |                |
| Friend                                             | 11.30          | 23  | 20.74 |                 |    |       |                                                     |              |                |
| Total                                              | 11.73          | 733 | 21.94 |                 |    |       |                                                     |              |                |
| Missing                                            |                | 98  |       |                 |    |       |                                                     |              |                |
| <b>Relationship patient</b>                        |                |     |       | 9.04            | 3  | .029* |                                                     |              |                |
| Spouse                                             | 9.96           | 557 | 21.48 |                 |    |       |                                                     |              |                |
| Son or daughter                                    | 16.02          | 129 | 26.96 |                 |    |       |                                                     |              |                |
| Other family member                                | 8.08           | 33  | 22.10 |                 |    |       |                                                     |              |                |
| Friend                                             | 7.25           | 23  | 22.38 |                 |    |       |                                                     |              |                |
| Total                                              | 10.85          | 742 | 22.67 |                 |    |       |                                                     |              |                |
| Missing                                            |                | 89  |       |                 |    |       |                                                     |              |                |
| <b>Physical symptoms</b>                           |                |     |       | 9.43            | 3  | .024* |                                                     |              |                |
| Spouse                                             | 13.72          | 565 | 30.83 |                 |    |       |                                                     |              |                |
| Son or daughter                                    | 8.98           | 128 | 26.94 |                 |    |       |                                                     |              |                |
| Other family member                                | 5.56           | 36  | 23.23 |                 |    |       |                                                     |              |                |
| Friend                                             | 4.17           | 24  | 20.41 |                 |    |       |                                                     |              |                |
| Total                                              | 12.22          | 753 | 29.68 |                 |    |       |                                                     |              |                |
| Missing                                            |                | 78  |       |                 |    |       |                                                     |              |                |

\*. Statistically significant differences between subcategories ( $p < .05$ ).
